# Supplementary material
Source: ML conference proceedings conference paper supplement (https://proceedings.neurips.cc/paper_files/paper/2016/hash/59f51fd6937412b7e56ded1ea2470c25-Abstract.html)
Supplement: Supplementary file 1 [file 59f51fd6937412b7e56ded1ea2470c25-Supplemental.zip]

Archive with 1 entries (1 files):
- xlap-nips-SI.pdf
